# Supplementary material for: Knockdown of transient receptor potential melastatin 2 reduces renal fibrosis and inflammation by blocking transforming growth factor-β1-activated JNK1 activation in diabetic mice
Source: publisher site journal article supplement (doi:10.18632/aging.203694), 2021-11-29
Supplement: Supplementary file [file aging-v13i22-203694-supplementary-material-SD1.pdf]

## SUPPLEMENTARY TABLES

**Supplementary Table 1. List of primary antibodies.**

| Name                            | Catalog    | Analysis                    | Dilutions      | Company           |
|---------------------------------|------------|-----------------------------|----------------|-------------------|
| TRPM2                           | #PA1-46473 | Western blot<br>IF staining | 1:1000<br>1:50 | Invitrogen        |
| Antiaquaporin 1(AQP1)           | #NB600-749 | IF staining                 | 1:200          | Novus Biologicals |
| TGF- $\beta$ 1                  | #ab64715   | Western blot                | 1:1000         | Abcam             |
| CTGF                            | #bs-0743R  | Western blot                | 1:1000         | Bioss             |
| $\alpha$ -SMA                   | #bs-33187M | Western blot                | 1:1000         | Bioss             |
| Fibronectin                     | #bs-0666R  | Western blot                | 1:1000         | Bioss             |
| Collagen I                      | #bs-7158R  | Western blot                | 1:500          | Bioss             |
| Collagen III                    | #bs-0549P  | Western blot                | 1:1000         | Bioss             |
| Phospho-AMPK(S487)              | #ab131357  | Western blot                | 1:1000         | Abcam             |
| JNK1                            | #ab199380  | Western blot                | 1:1000         | Abcam             |
| Phospho-IKK $\alpha$ (T23)      | #32041     | Western blot                | 1:1000         | Abcam             |
| IKK $\alpha$                    | #ab32041   | Western blot                | 1:1000         | Abcam             |
| Phospho-NF- $\kappa$ B (Ser536) | #3033      | Western blot                | 1:1000         | CST               |
| NF- $\kappa$ B                  | #8242      | Western blot                | 1:1000         | CST               |
| Lamin B                         | #ab32535   | Western blot                | 1:500          | Abcam             |
| GAPDH                           | #60004     | Western blot                | 1:10000        | Proteintech       |

IF, immunofluorescence.

**Supplementary Table 2. The RT-qPCR sequences used in the study.**

| Gene name            | Primer sequences (5'→3')                                   |
|----------------------|------------------------------------------------------------|
| mouse-TRPM2          | F: TACTCGCTTACGTGCGTAG<br>R: ATCGCTTCCGCCATAGTT            |
| human-TRPM2          | GAAGAGCATTTTCCGCAGAG<br>ATGAGCTCGCCTTCCTTGTA               |
| mouse-TNF- $\alpha$  | F:CATCTTCTCAAAACTCGAGTGACAA<br>R: TGGGAGTAGATAAAGGTACAGCCC |
| mouse-IL-1 $\beta$   | F: GCCTCGTGCTGTCGGACCCATAT<br>R: TCCTTTGAGGCCCAAGGCCACA    |
| mouse-IL-6           | F: TCCGAGTTGCCGAACGAC<br>R: ATGACTCTATGCTCCACGTC           |
| mouse-MCP-1          | F: CCCACTCACCTGCTGCTACT<br>R: TCTGGACCCATTTCCTTCTTG        |
| mouse- IFN- $\gamma$ | F: GCGTCATTGAATCACACCTG<br>R: TGAGCTCATTGAATGCTTGG         |
| mouse-GAPDH          | F: AGGTCGGTGTGAACGGATTTG<br>R: TGTAGACCATGTAGTTGAGGTCA     |
| human-GAPDH          | F: CTGCACCACCAACTGCTTAG<br>R: AGGTCCACCACTGACACGTT         |

**Supplementary Table 3. Clinical data on male patient samples.**

|                                                                   | <b>Normal</b>  | <b>Diabetic nephropathy</b> | <b>P-value</b> |
|-------------------------------------------------------------------|----------------|-----------------------------|----------------|
| Total numbers                                                     | 6              | 6                           |                |
| Age                                                               | 54.33 ± 2.93   | 54.67 ± 2.91                | 0.937          |
| Weight (kg)                                                       | 72.20 ± 3.57   | 62.20 ± 2.58                | 0.047          |
| Body mass index ( kg/m <sup>2</sup> )                             | 24.38 ± 0.62   | 20.85 ± 1.09                | 0.019          |
| Systolic blood pressure on admission (mmHg)                       | 115.50 ± 4.32  | 157.17 ± 3.73               | <0.001         |
| Diastolic blood pressure on admission (mmHg)                      | 73.17 ± 1.54   | 84.00 ± 1.93                | 0.001          |
| Serum creatinine (mmol/L)                                         | 63.83 ± 6.45   | 148.83 ± 20.66              | 0.008          |
| Serum uric acid (umol/L)                                          | 231.00 ± 12.56 | 370.50 ± 22.62              | <0.001         |
| Estimated glomerular filtration rate (ml/min/1.73m <sup>2</sup> ) | 108.00 ± 3.30  | 58.83 ± 2.34                | <0.001         |
| Serum albumin (g/L)                                               | 38.17 ± 3.50   | 26.33 ± 1.98                | 0.015          |
| Proteinuria (mg/day)                                              | 59.50 ± 4.82   | 3620.00 ± 613.89            | <0.001         |

Data are means ± S.E.
